# Supplementary material for: The molecular mechanism of SPOROCYTELESS/NOZZLE in controlling Arabidopsis ovule development
Source: PubMed Central journal article supplement — Cell Res. 2014 Nov 7;25(1):121–34. doi: 10.1038/cr.2014.145 (PMC4650584; doi:10.1038/cr.2014.145), 2014-11-07
Supplement: cr2014145x1.pdf [file cr2014145x1.pdf]

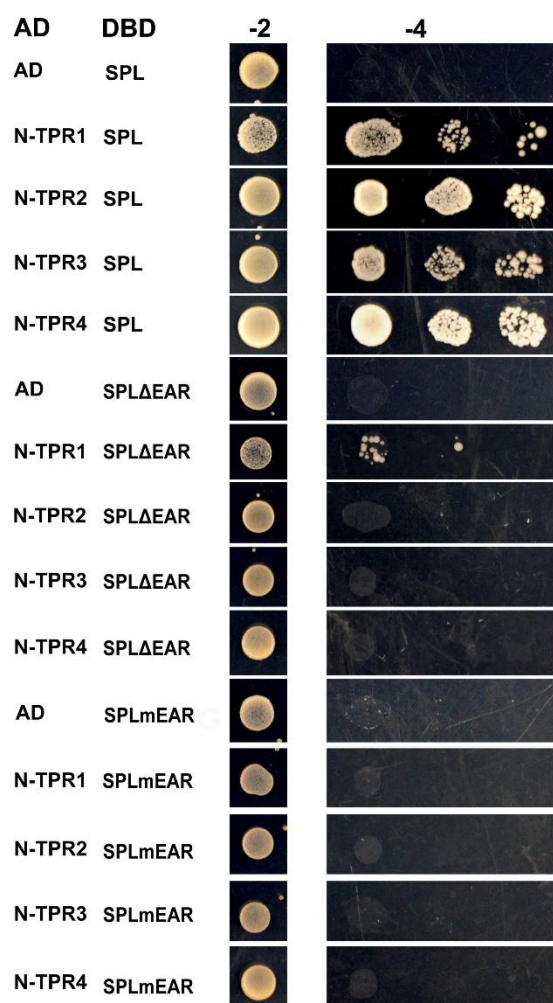

**Supplementary information, Figure S1** SPL interacts with other members of TPL family proteins using the C-terminal EAR motif.

Yeast two-hybrid assays indicated that SPL also interacted with TPR co-repressors. N-TPL was fused with AD to be prey and SPL, SPLΔEAR or SPLmEAR was fused with DBD to be baits. AD, activation domain; DBD, DNA-binding domain; SPLmEAR, SPL containing mutated EAR motif with three conserved leucines replaced by serines. TIE1ΔEAR, SPL without the EAR motif; N-TPL, the TPL N-terminus including residues from 1 to 188. Transformed yeasts were spotted on control medium (-2) or selective medium SD-Ade-Leu-Trp-His (-4) in 10-fold, 100-fold and 1000-fold dilutions. The empty vectors were as control.
