# Supplementary material for: The molecular mechanism of SPOROCYTELESS/NOZZLE in controlling Arabidopsis ovule development
Source: PubMed Central journal article supplement — Cell Res. 2014 Nov 7;25(1):121–34. doi: 10.1038/cr.2014.145 (PMC4650584; doi:10.1038/cr.2014.145), 2014-11-07
Supplement: cr2014145x4.pdf [file cr2014145x4.pdf]

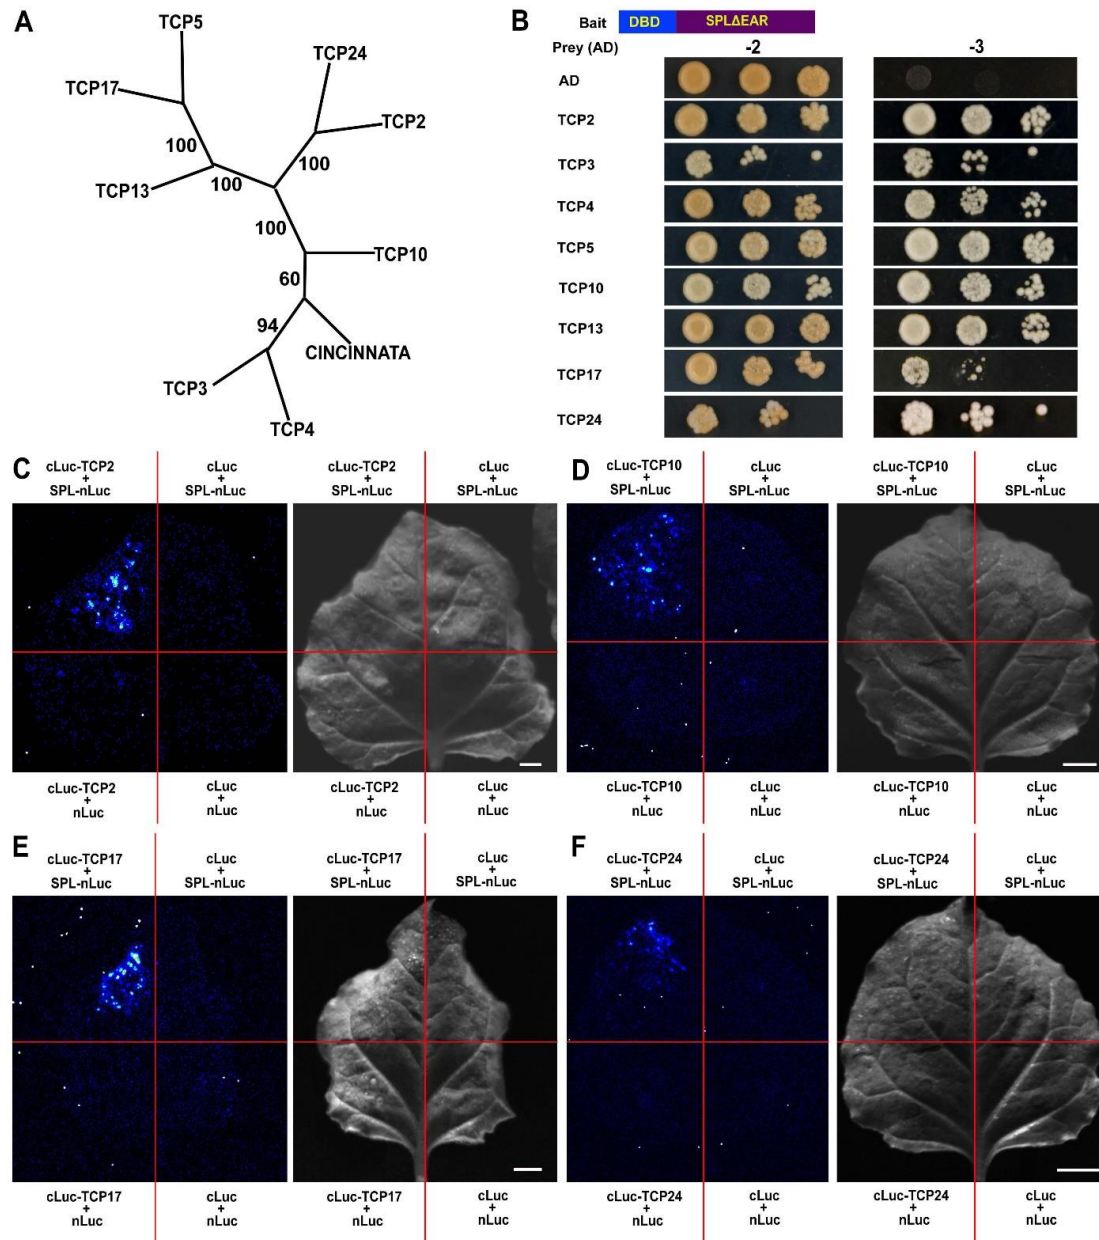

**Supplementary information, Figure S4 SPL interacts with CIN-like TCPs.**

(A) The phylogenetic tree of the CIN-like TCP family proteins from *Arabidopsis* and CINCINNATA from *Antirrhinum*. The unrooted similarity tree was generated using the neighbor-joining method and 100 bootstrap reiterations of the full amino acid sequences of the TCPs with the Phylip software package. Numbers indicate bootstrap values. (B) CIN-like TCPs interacted with the N-terminus of SPL deleted EAR-motif. Transformed yeast cells were spotted on control medium (-2) or selective medium (-3) in 10-fold, 100-fold and 1000-fold dilutions. The empty vector was as the control. (C) to (F) SPL was confirmed to interact with TCP2 (C), TCP10 (D), TCP17 (E) or TCP24 (F) *in vivo* by firefly luciferase complementation imaging assays. Scale bar, 1 cm (C-F).
