# Supplementary material for: The molecular mechanism of SPOROCYTELESS/NOZZLE in controlling Arabidopsis ovule development
Source: PubMed Central journal article supplement — Cell Res. 2014 Nov 7;25(1):121–34. doi: 10.1038/cr.2014.145 (PMC4650584; doi:10.1038/cr.2014.145), 2014-11-07
Supplement: cr2014145x5.pdf [file cr2014145x5.pdf]

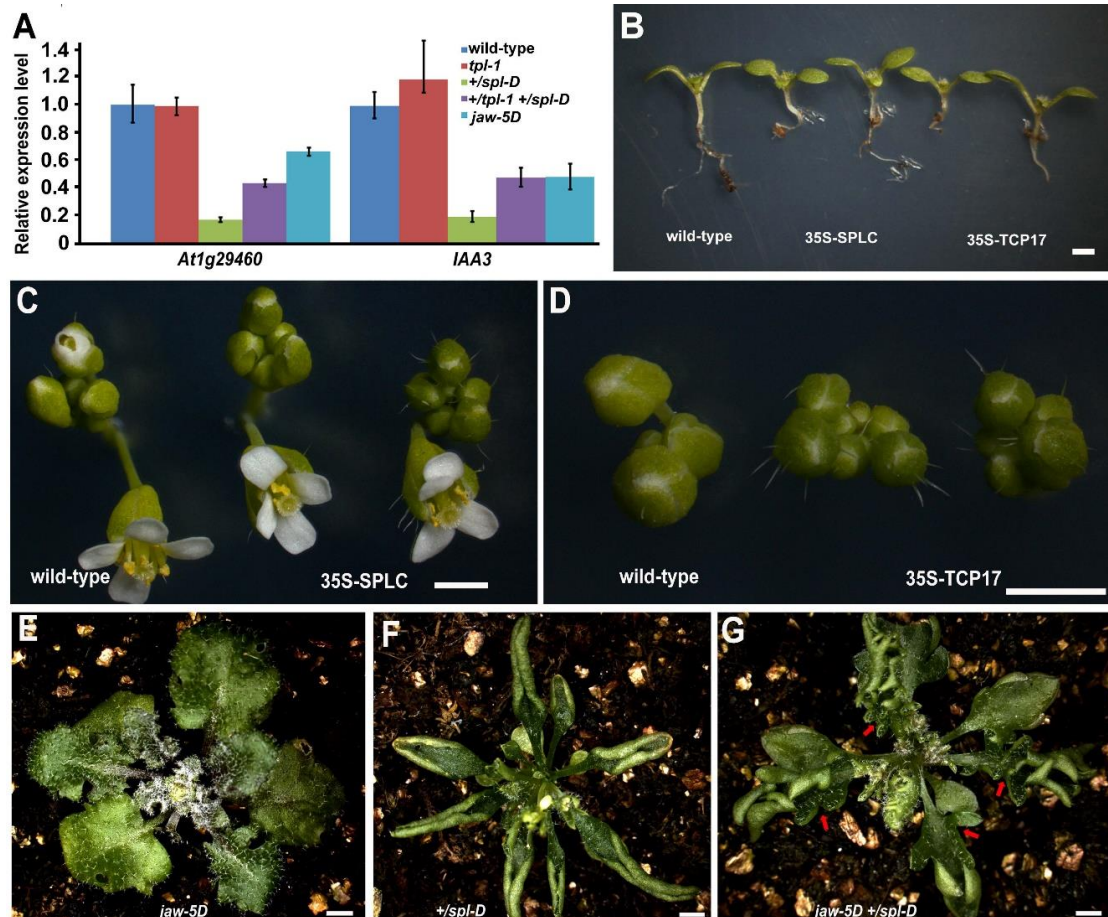

**Supplementary information, Figure S5** SPL was associated with CIN-like TCPs.

(A) The known TCP direct target genes were down-regulated in *spl-D* and in *jaw-5D* mutant in which the miR319 is overexpressed to down-regulate five CIN-like *TCP* genes, whereas the down-regulation was largely released in the *+spl-D +tpl-1* double mutants. The expression levels of the genes in wild-type plants were set to 1.0. The error bars represent the SD of three biological replicates. (B) to (D) Overexpression of *TCP17* or *SPLC* did not cause the phenotypes in the *TCP17-SPLC* overexpression lines. (E) to (G) The synergistic interaction between *jaw-5D* and *spl-D*. (E) The 26-day-old homozygous *jaw-5D*. (F) The 26-day-old heterozygous *spl-D*. (G) The *jaw-5D +spl-D* double mutant. The red arrows indicate the highly lobed leaves. Bars, 1 mm.
