# Supplementary material for: The molecular mechanism of SPOROCYTELESS/NOZZLE in controlling Arabidopsis ovule development
Source: PubMed Central journal article supplement — Cell Res. 2014 Nov 7;25(1):121–34. doi: 10.1038/cr.2014.145 (PMC4650584; doi:10.1038/cr.2014.145), 2014-11-07
Supplement: cr2014145x6.pdf [file cr2014145x6.pdf]

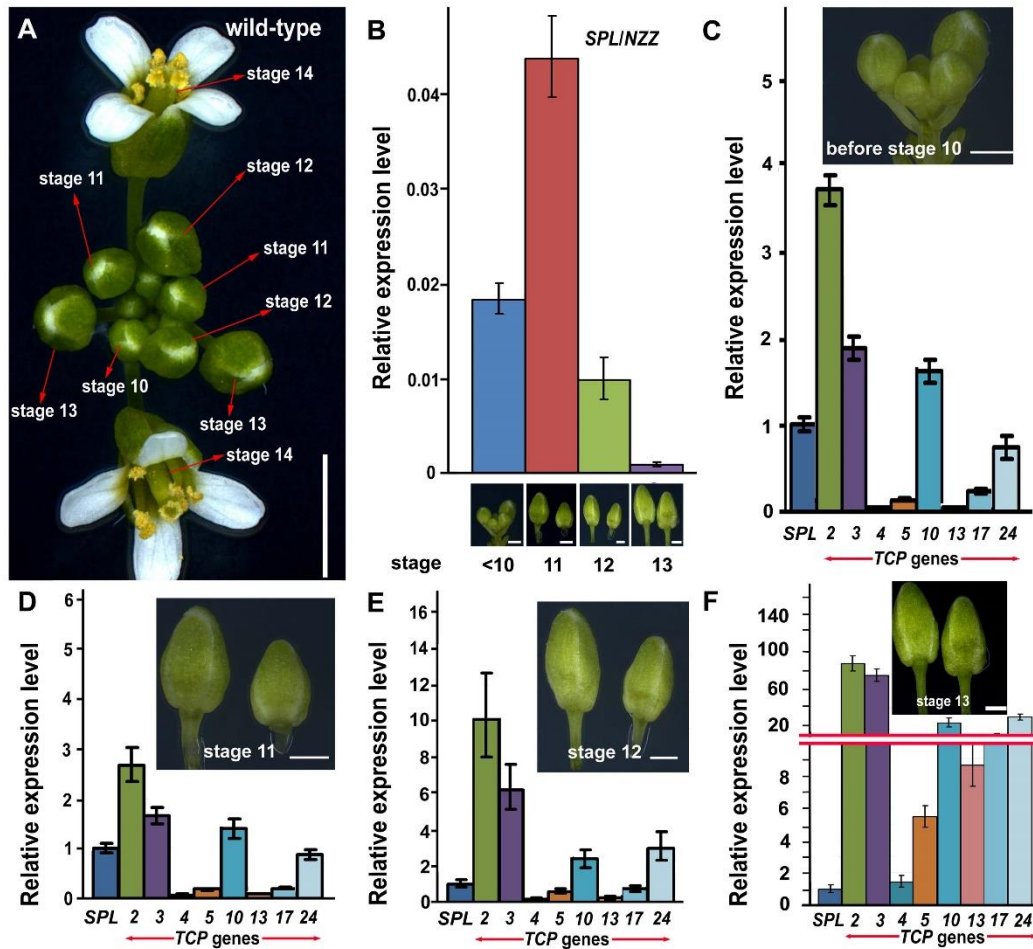

**Supplementary information, Figure S6** The CIN-like *TCP* genes were all expressed in flowers.

(A) The definition of flower stages according to previous description. Bar, 1 mm. (B) The relative expression level of *SPL* in the developing flower buds. The change of *SPL* relative expression level in the flower buds is consistent with that of GUS-staining in the ovules of *SPL*-GUS. The expression levels were normalized to the constitutive expression level of *ACT8*. The error bars represent the SD of three biological replicates. Bars, 250  $\mu$ m. (C) to (F) The relative expression levels of eight CIN-like *TCP* genes in the flower buds before stage 10 (C) and the flowers of stage 11 (D), stage 12 (E), stage 13 (F). The expression level of *SPL* was set to 1.0. The error bars represent the SD of three biological replicates. Bars, 250  $\mu$ m in (C) to (F).
