# Supplementary material for: The molecular mechanism of SPOROCYTELESS/NOZZLE in controlling Arabidopsis ovule development
Source: PubMed Central journal article supplement — Cell Res. 2014 Nov 7;25(1):121–34. doi: 10.1038/cr.2014.145 (PMC4650584; doi:10.1038/cr.2014.145), 2014-11-07
Supplement: cr2014145x7.pdf [file cr2014145x7.pdf]

**Supplementary information, Table S1** The primer list used in this work.

| Primer name    | Primer sequences (5'-3')                                   |
|----------------|------------------------------------------------------------|
| spl-F          | TGGACAGAACCAAAGATAAC                                       |
| spl-R          | GAAGCCTTGTAGCACAACAC                                       |
| LB3            | TAGCATCTGAATTTTCATAACCAATCTCGATACAC                        |
| TCP2-RT-F      | TCAGTCATTCCCTCGCTAATC                                      |
| TCP2-RT-R      | TGCCTTTACCCTTATGTTCT                                       |
| TCP3-RT-F      | TCCATGACCACTGACGATCT                                       |
| TCP3-RT-R      | GCTCCTCTTGTTTCGCCTTGA                                      |
| TCP4-RT-F      | TTCCTCCACCGGTTACCAA                                        |
| TCP4-RT-R      | ATGGCGAGAAATAGAGGAAG                                       |
| TCP5-RT-F      | TCCCGACATACCCTTCGTTT                                       |
| TCP5-RT-R      | TCATGATTTCGAGCTCATCAA                                      |
| TCP10-RT-F     | TTCGTTCTTGGGATCATCAT                                       |
| TCP10-RT-R     | AGAAGAGTTTGGTTGAGTAG                                       |
| TCP13-RT-F     | TTCCCAAACATTTTCGACAT                                       |
| TCP13-RT-R     | TACAACGCTCCGAGCCTAGA                                       |
| TCP17-RT-F     | TAGCAGCTCTTATCACTACA                                       |
| TCP17-RT-R     | AAGTTGACCACCACCGAGAA                                       |
| TCP24-RT-F     | GTCATCGATTTCTTCGTCTT                                       |
| TCP24-RT-R     | TCCTTTCCTTTGCCTTGTC                                        |
| AG RT-1        | GAGCAGCTTATGCCACCACCTCAA                                   |
| AG RT-2        | GACCCGCGGATGAGTAATGGTGAT                                   |
| SEP RT-1       | GAGGTTGATCACTACGGTCGTCAT                                   |
| SEP RT-2       | GTGTCATAAGGTAACCAACCCAACAT                                 |
| SPLC RT-1      | AATTTGGGAGCTACATGGAAGGAA                                   |
| SPLC RT-2      | GGACTGCAATCACCTACGAGTGAC                                   |
| SPL-F          | CACCATGGCGACTTCTCTCTTCTT                                   |
| SPL-R          | TTAAAGCTTCAAGGACAAAT                                       |
| SPL-mEAR-R     | TTAAGCCTTCGCGGACGCATCAATGGTATTAGGACT<br>GCAATCACCTACGAGTG  |
| SPL-ΔEAR-R     | TTAATCAATGGTATTAGGACTGC                                    |
| SPLC-F         | GGGGACAGCTTTCTTGTACAAAGTGGCTTCAATCTCA<br>AATCCTCAA         |
| SPLC-R         | GGGGACAACCTTTGTATAATAAAGTTGCTTAAAGCTT<br>CAAGGACAA         |
| SPL-TPLC-EAR-R | CTTGATATCTGGATTTGGCCTATCAATGGTATTAGGA<br>CTGC              |
| TPLC-SPL-EAR-F | GCAGTCCTAATACCATTGATAGGCCAAATCCAGATA<br>TCAAG              |
| TPL-R          | TCATCTCTGAGGCTGATCAG                                       |
| pATSP-attB4    | GGGGACAACCTTTGTATAGAAAAGTTGTGCAATACAT<br>GGCTGAATATAGGGGCA |

|               |                                                        |
|---------------|--------------------------------------------------------|
| pATSP-attBr1  | GGGGACTGCTTTTTTGTACAAACTTGTGATGATGATC<br>TTCTTCTCGGAAC |
| pSPL-F        | CACCTGCAATACATGGCTGAATATAGGGGCA                        |
| pSPL-R        | TGATGATGATCTTCTTCTCGGA                                 |
| TCP3-1        | <i>cacc</i> ATGGCACCAGATAACGACCA                       |
| TCP3-2        | TTAATGGCGAGAATCGGATG                                   |
| TCP5-1        | <i>cacc</i> ATGAGATCAGGAGAATGTGATG                     |
| TCP5-2        | TCAAGAATCTGATTCATTATCGCTAC                             |
| SPL-KPN1-F    | CGGGGTACCATGGCGACTTCTCTCTTCTT                          |
| SPL-SAL1-R    | ACGCGTCGACTTAAAGCTTCAAGGACAAAT                         |
| TCP2-KPN1-F   | GGGGTACCATGATTGGAGATCTAATGAA                           |
| TCP2-SAL1-R   | ACGCGTCGACTCAGTTCTTGCCTTTACCCT                         |
| TCP3-KPN1-F   | GGGGTACCATGGCACCAGATAACGACCA                           |
| TCP3-PST1-R   | AACTGCAGTTAATGGCGAGAATCGGATG                           |
| TCP5-KPN1-F   | GGGGTACCATGAGATCAGGAGAATGTGA                           |
| TCP5-PST1-R   | AACTGCAGTCAAGAATCTGATTCATTAT                           |
| TCP10-BAMH1-F | CGGGATCCAATGGGACTTAAAGGATATAG                          |
| TCP10-PST1-R  | AACTGCAGTTAGAGGTGTGAGTTTGGAG                           |
| TCP17-BAMH1-F | CGGGATCCAATGGGAATAAAAAAAGAAGA                          |
| TCP17-PST1-R  | AACTGCAGCTACTCGATATGGTCTGGTT                           |
| TCP17-1       | <i>cacc</i> ATGGGAATAAAAAAAGAAGA                       |
| TCP17-2       | CTACTCGATATGGTCTGGTT                                   |
| TCP24-KPN1-F  | GGGGTACCATGGAGGTTGACGAAGACAT                           |
| TCP24-PST1-R  | AACTGCAGCTATCTCCTTTTCCTTTGCCT                          |
| SPLC-1        | <i>cacc</i> ATGTCAATCTCAAATCCTCA                       |
| SPLC-2        | TTAAAGCTTCAAGGACAAAT                                   |

---
